# Supplementary material for: PAX2 Expression in Ovarian Cancer
Source: Int J Mol Sci. 2013 Mar 15;14(3):6090–105. doi: 10.3390/ijms14036090 (PMC3634442; doi:10.3390/ijms14036090)
Supplement: Supplementary File 2 — Table S1. Differentially expressed genes between PAX2 knockdown (XLSX, 18 KB) [file ijms-14-06090-s002.xlsx]

## Sheet: Sheet0
Table S1. Differentially expressed genes between PAX2 knockdown (shRNA 15839, 15840 and 15841) cells and control cells (vector and nontarget control)
p-value	Log2Ratio (PAX2 knockdown/control)	ID	Symbol	Entrez Gene Name	Location	Type(s)	Molecular Function
2.39e-05	1.056	203505_at	ABCA1	ATP-binding cassette, sub-family A (ABC1), member 1	Plasma Membrane	transporter
0.00236	0.682	209765_at	ADAM19	ADAM metallopeptidase domain 19	Plasma Membrane	peptidase	Cell movement
0.00197	0.757	212992_at	AHNAK2	AHNAK nucleoprotein 2	unknown	other
0.00073	-1.018	206385_s_at	ANK3	ankyrin 3, node of Ranvier (ankyrin G)	Plasma Membrane	other
0.00139	0.848	201012_at	ANXA1	annexin A1	Plasma Membrane	other	cell proliferation and movement
0.00108	0.692	1559433_at	APCDD1L-AS1	APCDD1L antisense RNA 1	unknown	other
2.3e-05	-0.916	232630_at	APIP	APAF1 interacting protein	Cytoplasm	enzyme
0.000208	-0.949	207262_at	APOF	apolipoprotein F	Extracellular Space	transporter
0.000429	0.958	1557285_at	AREG/AREGB	amphiregulin	Extracellular Space	growth factor	cell proliferation and movement
0.000385	1.2	202208_s_at	ARL4C	ADP-ribosylation factor-like 4C	Nucleus	enzyme
9.15e-05	0.889	224797_at	ARRDC3	arrestin domain containing 3	Plasma Membrane	other	cell proliferation and movement
0.00154	-1.405	213745_at	ATRNL1	attractin-like 1	unknown	other
0.000183	-0.719	241031_at	C2CD4A	C2 calcium-dependent domain containing 4A	unknown	other
7.96e-05	-0.877	234996_at	CALCRL	calcitonin receptor-like	Plasma Membrane	G-protein coupled receptor	cell proliferation and movement
0.000139	0.737	201617_x_at	CALD1	caldesmon 1	Cytoplasm	other
0.00166	-0.718	237160_at	CCDC83	coiled-coil domain containing 83	unknown	other
0.000851	1.064	200951_s_at	CCND2	cyclin D2	Nucleus	other	cell proliferation
0.000272	0.771	217523_at	CD44	CD44 molecule (Indian blood group)	Plasma Membrane	enzyme	cell proliferation and movement
0.000403	0.745	209286_at	CDC42EP3	CDC42 effector protein (Rho GTPase binding) 3	Cytoplasm	other
0.000203	0.846	218451_at	CDCP1	CUB domain containing protein 1	Plasma Membrane	other	cell proliferation and movement
0.000161	0.891	226350_at	CHML	choroideremia-like (Rab escort protein 2)	Cytoplasm	enzyme
0.000944	0.738	226372_at	CHST11	carbohydrate (chondroitin 4) sulfotransferase 11	Cytoplasm	enzyme	cell proliferation
0.000996	-0.678	1561105_at	CLDN11	claudin 11	Plasma Membrane	other	cell proliferation and movement
0.00162	-1.116	231766_s_at	COL12A1	collagen, type XII, alpha 1	Extracellular Space	other
0.00054	1.975	202311_s_at	COL1A1	collagen, type I, alpha 1	Extracellular Space	other	cell proliferation and movement
0.000341	0.721	213428_s_at	COL6A1	collagen, type VI, alpha 1	Extracellular Space	other	cell proliferation
0.00256	0.745	226237_at	COL8A1	collagen, type VIII, alpha 1	Extracellular Space	other	cell proliferation
0.00388	1.361	221541_at	CRISPLD2	cysteine-rich secretory protein LCCL domain containing 2	Cytoplasm	other
0.000323	-0.758	209618_at	CTNND2	catenin (cadherin-associated protein), delta 2	Plasma Membrane	other	cell proliferation and movement
0.0002	0.705	231234_at	CTSC	cathepsin C	Cytoplasm	peptidase	cell proliferation and movement
0.000238	0.801	226609_at	DCBLD1	discoidin, CUB and LCCL domain containing 1	Extracellular Space	other
0.00236	-1.037	208386_x_at	DMC1	DMC1 dosage suppressor of mck1 homolog, meiosis-specific homologous recombination (yeast)	Nucleus	enzyme
0.00033	-1.106	214844_s_at	DOK5	docking protein 5	Plasma Membrane	other
0.00031	0.848	200606_at	DSP	desmoplakin	Plasma Membrane	other	cell proliferation
0.00489	0.732	227449_at	EPHA4	EPH receptor A4	Plasma Membrane	kinase	cell movement
0.00346	0.825	232164_s_at	EPPK1	epiplakin 1	Cytoplasm	other
7.95e-05	0.771	201328_at	ETS2	v-ets erythroblastosis virus E26 oncogene homolog 2 (avian)	Nucleus	transcription regulator	cell proliferation
0.00207	0.737	239178_at	FGF9	fibroblast growth factor 9 (glia-activating factor)	Extracellular Space	growth factor	cell proliferation and movement
0.00435	0.725	202949_s_at	FHL2	four and a half LIM domains 2	Nucleus	transcription regulator	cell proliferation and movement
0.000817	-0.733	230964_at	FREM2	FRAS1 related extracellular matrix protein 2	Extracellular Space	other
0.00021	1.316	240028_at	FSIP2	fibrous sheath interacting protein 2	Cytoplasm	other
0.00275	-0.673	224379_at	FTHL17	ferritin, heavy polypeptide-like 17	unknown	other
0.00331	0.807	219764_at	FZD10	frizzled family receptor 10	Plasma Membrane	G-protein coupled receptor
0.00199	1.865	213524_s_at	G0S2	G0/G1switch 2	Cytoplasm	other	cell proliferation
1.14e-06	2.43	218469_at	GREM1	gremlin 1	Extracellular Space	other	cell proliferation and movement
0.000138	-0.977	208181_at	HIST1H4A (includes others)	histone cluster 1, H4a	Nucleus	other
0.000168	0.771	239153_at	HOTAIR	HOX transcript antisense RNA	unknown	other
0.00143	1.054	219985_at	HS3ST3A1	heparan sulfate (glucosamine) 3-O-sulfotransferase 3A1	Cytoplasm	enzyme
1.98e-05	2.063	227361_at	HS3ST3B1	heparan sulfate (glucosamine) 3-O-sulfotransferase 3B1	Cytoplasm	enzyme
0.00374	0.758	1552766_at	HS6ST2	heparan sulfate 6-O-sulfotransferase 2	Plasma Membrane	enzyme	cell proliferation
0.00236	-0.708	1555935_s_at	HUNK	hormonally up-regulated Neu-associated kinase	Cytoplasm	kinase	cell proliferation
0.000286	0.914	201656_at	ITGA6	integrin, alpha 6	Plasma Membrane	other	cell proliferation and movement
0.00388	-0.794	226534_at	KITLG	KIT ligand	Extracellular Space	growth factor	cell proliferation and movement
0.000941	0.943	237123_x_at	KLHL9	kelch-like 9 (Drosophila)	Cytoplasm	other
0.000346	-0.91	230865_at	LIX1	Lix1 homolog (chicken)	unknown	other
0.000143	-0.695	230184_at	LOC100506421	uncharacterized LOC100506421	unknown	other
0.00437	1.061	1556936_at	LOC100506834	uncharacterized LOC100506834	unknown	other
0.000177	0.784	1556704_s_at	LOC286297	uncharacterized LOC286297	unknown	other
0.0046	0.943	227889_at	LPCAT2	lysophosphatidylcholine acyltransferase 2	Cytoplasm	enzyme
0.00106	-0.671	202626_s_at	LYN	v-yes-1 Yamaguchi sarcoma viral related oncogene homolog	Cytoplasm	kinase	cell proliferation and movement
0.000702	1.375	212909_at	LYPD1	LY6/PLAUR domain containing 1	Plasma Membrane	G-protein coupled receptor
7.06e-05	0.991	226084_at	MAP1B	microtubule-associated protein 1B	Cytoplasm	other	cell movement
0.00289	-0.704	1553743_at	METTL21A	methyltransferase like 21A	unknown	other
0.0027	0.67	205932_s_at	MSX1	msh homeobox 1	Nucleus	transcription regulator	cell proliferation
0.000315	0.783	212364_at	MYO1B	myosin IB	Cytoplasm	other
0.0035	0.857	1557998_at	NAALADL2	N-acetylated alpha-linked acidic dipeptidase-like 2	unknown	other
9.91e-05	1.011	236471_at	NFE2L3	nuclear factor (erythroid-derived 2)-like 3	Nucleus	transcription regulator
9.32e-05	1.094	230668_at	NKAIN4	Na+/K+ transporting ATPase interacting 4	Extracellular Space	other
0.000132	0.97	201310_s_at	NREP	neuronal regeneration related protein homolog (rat)	Cytoplasm	other	cell proliferation and movement
2.23e-05	-0.939	210683_at	NRTN	neurturin	Extracellular Space	growth factor	cell movement
0.000474	-0.667	206228_at	PAX2	paired box 2	Nucleus	transcription regulator	cell proliferation and movement
0.00205	0.79	241833_at	PEX5L	peroxisomal biogenesis factor 5-like	Cytoplasm	ion channel
0.00298	-1.067	225380_at	PKDCC	protein kinase domain containing, cytoplasmic homolog (mouse)	Cytoplasm	kinase
0.000532	0.702	235230_at	PLCXD2	phosphatidylinositol-specific phospholipase C, X domain containing 2	unknown	enzyme
0.000925	0.94	214981_at	POSTN	periostin, osteoblast specific factor	Extracellular Space	other	cell proliferation and movement
3.63e-05	0.993	227006_at	PPP1R14A	protein phosphatase 1, regulatory (inhibitor) subunit 14A	Cytoplasm	other
0.00105	1.027	202458_at	PRSS23	protease, serine, 23	Extracellular Space	peptidase
0.00215	-0.67	238695_s_at	RAB39B	RAB39B, member RAS oncogene family	Plasma Membrane	enzyme
0.00202	0.76	202976_s_at	RHOBTB3	Rho-related BTB domain containing 3	unknown	enzyme
1.62e-05	1.283	232060_at	ROR1	receptor tyrosine kinase-like orphan receptor 1	Plasma Membrane	kinase	cell proliferation
0.00331	-0.704	241185_at	SAE1	SUMO1 activating enzyme subunit 1	Cytoplasm	enzyme	cell proliferation
0.00139	0.859	229273_at	SALL1	sal-like 1 (Drosophila)	Nucleus	transcription regulator
0.00393	1.069	1554920_at	SCEL	sciellin	Cytoplasm	other
0.000808	-0.868	1552367_a_at	SCIN	scinderin	Cytoplasm	other	cell proliferation
0.00247	0.702	212314_at	SEL1L3	sel-1 suppressor of lin-12-like 3 (C. elegans)	unknown	other
0.00303	0.699	1554168_a_at	SH3KBP1	SH3-domain kinase binding protein 1	Cytoplasm	other	cell proliferation and movement
0.000114	1.006	230493_at	SHISA2	shisa homolog 2 (Xenopus laevis)	unknown	other
0.000239	0.7	228347_at	SIX1	SIX homeobox 1	Nucleus	transcription regulator	cell proliferation and movement
0.00106	0.716	230494_at	SLC20A1	solute carrier family 20 (phosphate transporter), member 1	Plasma Membrane	transporter	cell proliferation
0.00497	0.71	235299_at	SLC41A2	solute carrier family 41, member 2	Plasma Membrane	transporter
0.000413	-0.743	220931_at	SMIM2	small integral membrane protein 2	unknown	other
0.00297	0.763	203217_s_at	ST3GAL5	ST3 beta-galactoside alpha-2,3-sialyltransferase 5	Cytoplasm	enzyme	cell movement
0.00013	1.447	203439_s_at	STC2	stanniocalcin 2	Extracellular Space	other	cell proliferation
0.000568	-0.704	215301_at	SYCE1L	synaptonemal complex central element protein 1-like	unknown	other
0.000284	1.706	232068_s_at	TLR4	toll-like receptor 4	Plasma Membrane	transmembrane receptor	cell proliferation and movement
2.75e-05	-1.007	204932_at	TNFRSF11B	tumor necrosis factor receptor superfamily, member 11b	Plasma Membrane	transmembrane receptor	cell proliferation and movement
0.000391	-0.878	230625_s_at	TSPAN12	tetraspanin 12	Plasma Membrane	transmembrane receptor
0.00089	0.705	223279_s_at	UACA	uveal autoantigen with coiled-coil domains and ankyrin repeats	Cytoplasm	other
0.000224	1.375	219478_at	WFDC1	WAP four-disulfide core domain 1	Extracellular Space	other	cell proliferation
0.000203	0.724	219836_at	ZBED2	zinc finger, BED-type containing 2	unknown	other
